# Supplementary material for: Combination of electrografting and layer-by-layer deposition: an efficient way to tailor polymer coatings of (semi)-conductors
Source: Royal Society of Chemistry journal article supplement (doi:10.1039/b712130j), 2007-01-01
Supplement: b712130j.pdf [file b712130j.pdf]

## Combination of Electrografting and Layer by Layer deposition : An efficient way to tailor polymer coatings of (semi)-conductors.

Aurélia Charlot, Sabine Gabriel, Christophe Detrembleur, Robert Jérôme and Christine Jérôme\*

Center for Education and Research on Macromolecules, University of Liege, B6 Sart-Tilman,  
B-4000 LIEGE, Belgium. Fax: 32 4366 3497; Tel: 32 4366 3491; E-mail: c.jerome@ulg.ac.be

### ESI

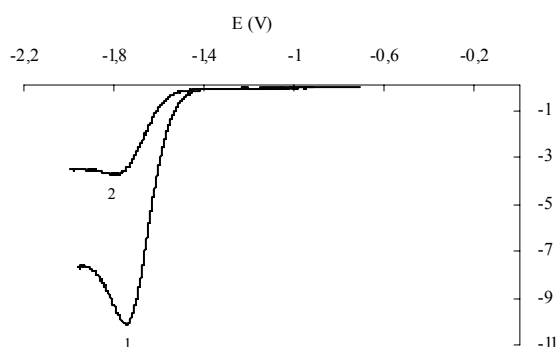

**Fig. S1:** Voltammograms recorded onto stainless steel for the reduction of NSA (0.1M) in DMF/5.10<sup>-2</sup>M TEAP, at 20 mV/s, (1) first scan and (2) second scan.
